# Supplementary material for: Multiparametric Detection of Antibodies against Different EBV Antigens to Predict Risk for Nasopharyngeal Carcinoma in a High-Risk Population of China
Source: Oxford University Press journal article supplement (doi:10.1158/1940-6207.capr-17-0035), 2017-07-28
Supplement: 19406207capr170035-sup-178473_4_supp_4157558_ftp9fs.docx [file 19406207capr170035-sup-178473_4_supp_4157558_ftp9fs.docx]

Table S3. Comparison of sensitivity between Anti-EBV EUROLINE and other methods in early NPC stage

|  | p-value | | | | | | |
| --- | --- | --- | --- | --- | --- | --- | --- |
|  | VCA |  | EA |  | VCA & EA |  | EBV-DNA |
| Stage ⅠandⅡ | 0.285 |  | <0.001 |  | 0.017 |  | <0.001 |
| T1-2 stage | 0.031 |  | <0.001 |  | <0.001 |  | <0.001 |

The cutoff values were VCA ≥1:20 and EA≥1:10 and EBV-DNA>1000 and Anti-EBV EUROLINE >26.1%.

p-value of sensitivity were compared between Anti-EBV EUROLINE and other methods by paired comparison chi square test.
