# Supplementary material for: Multiparametric Detection of Antibodies against Different EBV Antigens to Predict Risk for Nasopharyngeal Carcinoma in a High-Risk Population of China
Source: Oxford University Press journal article supplement (doi:10.1158/1940-6207.capr-17-0035), 2017-07-28
Supplement: 19406207capr170035-sup-178473_4_supp_4157561_ht0sff.docx [file 19406207capr170035-sup-178473_4_supp_4157561_ht0sff.docx]

Table S2. Test performance of different indexes

a:ROC curve of the index was compared with Anti-EBV EUROLINE

b:TOTAL stand for the sum of all proteins of EUROLINE
