# Supplementary material for: Multiparametric Detection of Antibodies against Different EBV Antigens to Predict Risk for Nasopharyngeal Carcinoma in a High-Risk Population of China
Source: Oxford University Press journal article supplement (doi:10.1158/1940-6207.capr-17-0035), 2017-07-28
Supplement: 19406207capr170035-sup-178473_4_supp_4157562_htp9h3.docx [file 19406207capr170035-sup-178473_4_supp_4157562_htp9h3.docx]

| **Table S1. Characteristics of study participants.** | | | | | | | | | |
| --- | --- | --- | --- | --- | --- | --- | --- | --- | --- |
|  |  | |  | |  | |  | |  | |
|  |  | | **NPC** | | **Control** | | ***p*** | |  | |
| **n** |  | | 300 | | 494 | |  | |  | |
| **Gender, % male** | | 68.6 | | 47.2 | |  | |  | |
| **Age, years** |  |  | |  | |  | |  | |
| **Median** |  | 45 | | 44 | |  | |  | |
| **Mean (SD)** |  | 45(10) | | 44(13) | | 0.29 | |  | |
|  |  |  | |  | |  | |  | |

Control includes HS, NNPC and BNL.
